# Supplementary material for: LASP1 Is a HIF1α Target Gene Critical for Metastasis of Pancreatic Cancer
Source: Oxford University Press journal article supplement (doi:10.1158/0008-5472.can-14-2040), 2014-11-10
Supplement: 00085472can142040-sup-134542_1_supp_data_2652507_nbl6bx.doc [file 00085472can142040-sup-134542_1_supp_data_2652507_nbl6bx.doc]

**Supplementary** Table 1. Antibodies and primers

| **Antibodies** |  | |  | |  |  |
| --- | --- | --- | --- | --- | --- | --- |
| Name | Manufacturer | | Number | | Type | Usage |
| LASP-1 | Merck Millipore | | MAB8991 | | Monoclonal | WB,IHC,IF,IP |
| HIF-1α | Abcam | | ab113642 | | Monoclonal | WB,IHC |
| β-actin | Cell Signaling Technology | | 8H10D10 | | Monoclonal | WB |
| Phalloidin | Beyotine Biotechnology | | C1033 | |  | IF |
| **siRNAs** | **sequences (5’-3’)** | |  | |  |  |
| LASP-1 #1 | CUGGAUAAGUUCUGGCAUATT/ UAUGCCAGAACUUAUCCAGTT | | | | | |
| LASP-1 #2 | GCUACAAGGAGGAGUUUGATT/ UCAAACUCCUCCUUGUAGCTT | | | | | |
| LASP-1 #3 | GGACCAGAUCAGUAACAUATT/ UAUGUUACUGAUCUGGUCCTT | | | | | |
| HIF-1α #1 | CCAGCAGACUCAAAUACAATT/ UUGUAUUUGAGUCUGCUGGTT | | | | | |
| HIF-1α #2 | GCCUCUUUGACAAACUUAATT/ UUAAGUUUGUCAAAGAGGCTT | | | | | |
| HIF-1α #3 | CAGGCCACAUUCACGUAUATT/ UAUACGUGAAUGUGGCCUGTT | | | | | |
| **Primer sequences (5’-3’)** | |  | |  | |  |
| LASP-1 | F:ATGAACCCCAACTGCGCC R:TCAGATGGCCTCCACGTAGTT PCR | | | | | |
| β-actin | F: CTACCTTCAACTCCATCATGAAGTG R: TGCGCTCAGGAGGAGC | | | | | |
| LASP-1-P*(1) | F: GGGGTCCGAGGAATGAC R: AAAGGAAGAGGCGTGCTG | | | | | |
| LASP-1-P*(2) | F: ACGCCCTTGTCTCCCGTCA R: TATCTGCTGGCTGCGTGCC | | | | | |
| LASP-1-P*(3) | F: AGCAGATACTTGTCCCCATCTT R:CCAGTGCAAACTGAGATAAACG | | | | | |
| LASP-1-P*(4) | F:CACTGTGTTCGTTTATCTCAGTTT R: GCCCTTCTCCAACTTCAAC | | | | | |
| VEGF-P* | F: GCCTCTGTCTGCCCAGCTGC R: GTGGAGCTGAGAACGGGAAGC | | | | | |

WB: Western boltting; IHC: Immunohistochemistry; IF:Immunofluorescence; siRNA: Small interfering RNA; P*: Promoter

**Supplymentary figure legends:**

**Figure 1. BxPC-3 and Panc-1 cells were transfected with pcDNA3.1 and pcDNA3.1-LASP1 plasmids (2 μg) for 48 h and assessed by RT-PCR and Western blot analyses.**

**Figure 2. HIF-1α protein expression in CFPAC-1 cell transfected with negative control siRNA (siNC) and HIF-1α** **siRNA (si HIF-1α#1-3) (50 nM) for 48 hours determined by Western blot. β-actin was used as a loading control.**

**Figure 3.**

**(A) The morphology of Panc-1/pLV vector and Panc-1/pLV LASP-1 cells.**

**(B) LASP-1 expression determined by Western blot analysis in Panc-1/pLV vector andPanc-1/pLV LASP-1 cells.**
